# Supplementary material for: Photophysical properties of iminopyrrolyl boron complexes: A DFT interpretation
Source: Royal Society of Chemistry journal article supplement (doi:10.1039/c2dt31104f), 2012-01-01
Supplement: c2dt31104f.pdf [file c2dt31104f.pdf]

## Supporting Information

# Photophysical properties of iminopyrrolyl boron complexes: a DFT interpretation

Maria José Calhorda, D. Suresh, Pedro T. Gomes, Roberto E. Di Paolo, and António L. Maçanita

### Computational studies - Coordinates of optimized ground and singlet excited states

#### Compound A ( $S_0$ )

|   |          |          |          |
|---|----------|----------|----------|
| N | -0.73380 | -1.41377 | 0.13120  |
| N | -2.68435 | -0.05814 | 0.10073  |
| C | -0.41019 | -0.06799 | 0.02894  |
| H | 1.54621  | 1.00387  | -0.07011 |
| C | 0.41409  | -2.11444 | 0.17802  |
| H | 0.41887  | -3.19537 | 0.26735  |
| H | 2.55295  | -1.50816 | 0.10284  |
| C | 1.50669  | -1.22246 | 0.09530  |
| C | -4.20128 | 1.64237  | -0.81400 |
| C | -6.33262 | 0.48320  | 0.55663  |
| H | -7.16160 | 0.02252  | 1.09262  |
| C | 0.99110  | 0.07562  | 0.00504  |
| H | -3.38435 | 2.06566  | -1.39714 |
| C | -1.58928 | 0.68620  | 0.00236  |
| C | -5.06260 | -0.08253 | 0.65232  |
| C | -3.98119 | 0.50249  | -0.02155 |
| C | -6.54501 | 1.63150  | -0.20889 |
| H | -7.53998 | 2.06903  | -0.28056 |
| C | -5.47271 | 2.20531  | -0.89649 |
| H | -5.62878 | 3.08505  | -1.51977 |
| H | -4.89314 | -0.96189 | 1.26868  |
| H | -1.63921 | 1.77022  | -0.07790 |
| B | -2.28816 | -1.64582 | 0.22135  |
| C | -2.85934 | -2.44001 | -1.06667 |
| C | -2.12220 | -2.51963 | -2.26300 |
| C | -4.12861 | -3.04902 | -1.06217 |
| C | -2.61821 | -3.17475 | -3.39355 |
| C | -4.63602 | -3.70417 | -2.18701 |
| C | -3.88054 | -3.77059 | -3.35974 |
| H | -1.13165 | -2.06408 | -2.31517 |
| H | -4.73324 | -3.02307 | -0.15467 |
| H | -2.01668 | -3.22020 | -4.30222 |
| H | -5.62262 | -4.16679 | -2.14617 |
| H | -4.27154 | -4.28395 | -4.23881 |
| C | -2.65522 | -2.25638 | 1.67733  |
| C | -2.80226 | -3.64447 | 1.85556  |
| C | -2.72027 | -1.45646 | 2.83339  |
| C | -3.01456 | -4.20556 | 3.11865  |
| C | -2.93764 | -2.00517 | 4.09930  |
| C | -3.08725 | -3.38644 | 4.24679  |
| H | -2.75366 | -4.30184 | 0.98614  |

|   |          |          |         |
|---|----------|----------|---------|
| H | -2.60209 | -0.37447 | 2.74646 |
| H | -3.12629 | -5.28561 | 3.22001 |
| H | -2.98851 | -1.35396 | 4.97256 |
| H | -3.25796 | -3.81965 | 5.23270 |

### Compound A (S<sub>1</sub>)

|   |              |              |              |
|---|--------------|--------------|--------------|
| N | -0.761246000 | -1.435794000 | 0.107709000  |
| N | -2.667959000 | -0.043491000 | 0.018078000  |
| C | -0.380400000 | -0.119320000 | -0.096630000 |
| H | 1.643670000  | 0.840729000  | -0.298800000 |
| C | 0.356917000  | -2.192315000 | 0.195739000  |
| H | 0.310964000  | -3.262123000 | 0.365632000  |
| H | 2.527533000  | -1.698358000 | 0.061957000  |
| C | 1.498027000  | -1.358329000 | 0.035094000  |
| C | -4.105312000 | 1.916561000  | -0.278780000 |
| C | -6.328027000 | 0.277818000  | 0.203566000  |
| H | -7.193633000 | -0.355623000 | 0.392277000  |
| C | 1.049330000  | -0.053142000 | -0.151175000 |
| H | -3.257368000 | 2.564915000  | -0.477080000 |
| C | -1.498923000 | 0.714433000  | -0.170916000 |
| C | -5.064912000 | -0.280079000 | 0.227502000  |
| C | -3.907526000 | 0.521582000  | -0.014404000 |
| C | -6.505475000 | 1.648049000  | -0.060666000 |
| H | -7.504764000 | 2.080094000  | -0.081063000 |
| C | -5.381812000 | 2.452965000  | -0.299337000 |
| H | -5.510053000 | 3.514893000  | -0.507225000 |
| H | -4.934973000 | -1.335966000 | 0.439534000  |
| H | -1.501089000 | 1.783457000  | -0.317522000 |
| B | -2.319682000 | -1.619799000 | 0.204846000  |
| C | -2.879126000 | -2.472099000 | -1.066895000 |
| C | -2.291965000 | -2.304366000 | -2.335551000 |
| C | -3.956687000 | -3.371372000 | -0.983544000 |
| C | -2.746534000 | -2.998617000 | -3.458843000 |
| C | -4.422181000 | -4.072575000 | -2.100241000 |
| C | -3.816900000 | -3.889340000 | -3.344591000 |
| H | -1.451672000 | -1.616470000 | -2.451295000 |
| H | -4.440498000 | -3.543233000 | -0.020283000 |
| H | -2.264230000 | -2.844872000 | -4.424833000 |
| H | -5.256967000 | -4.766408000 | -1.995535000 |
| H | -4.175213000 | -4.435355000 | -4.217771000 |
| C | -2.711489000 | -2.188353000 | 1.673280000  |
| C | -2.611576000 | -3.567237000 | 1.943551000  |
| C | -3.049727000 | -1.354816000 | 2.754468000  |
| C | -2.851102000 | -4.089184000 | 3.217595000  |
| C | -3.298401000 | -1.865933000 | 4.031450000  |
| C | -3.201675000 | -3.238427000 | 4.268456000  |
| H | -2.348002000 | -4.252716000 | 1.136186000  |
| H | -3.122492000 | -0.276607000 | 2.601925000  |
| H | -2.767793000 | -5.163021000 | 3.388816000  |
| H | -3.565547000 | -1.188998000 | 4.843647000  |
| H | -3.395211000 | -3.641236000 | 5.263036000  |

### Compound B (S<sub>0</sub>)

|   |          |          |          |
|---|----------|----------|----------|
| N | -0.08336 | 0.51181  | 18.11648 |
| N | -1.90705 | 0.43696  | 16.59691 |
| C | -1.93024 | 1.59984  | 17.35529 |
| C | 1.89279  | -0.60183 | 13.29323 |
| H | 2.49896  | -0.62809 | 12.38735 |
| C | -3.02807 | 2.39200  | 16.96419 |
| H | -3.31058 | 3.35505  | 17.37382 |
| C | 0.32258  | -0.53933 | 15.65903 |
| C | -2.94659 | 0.47778  | 15.74384 |
| H | -3.13563 | -0.32271 | 15.03682 |
| C | -3.66889 | 1.67536  | 15.94739 |
| H | -4.55903 | 1.97254  | 15.40388 |
| C | 0.19773  | -1.58010 | 14.71963 |
| H | -0.51458 | -2.38518 | 14.90640 |
| C | 2.07998  | -0.52106 | 18.56399 |
| H | 2.10081  | -0.89170 | 17.54292 |
| C | 2.03258  | 0.44661  | 14.20562 |
| H | 2.74876  | 1.24614  | 14.01398 |
| C | -1.11155 | -1.88438 | 17.58983 |
| C | 1.25322  | 0.47422  | 15.36469 |
| H | 1.37976  | 1.30777  | 16.05827 |
| C | 0.99047  | 0.25023  | 18.99587 |
| C | 1.00274  | 0.75698  | 20.30672 |
| H | 0.14379  | 1.30531  | 20.68943 |
| C | -0.84731 | 1.59284  | 18.24025 |
| H | -0.61861 | 2.37728  | 18.95823 |
| C | 0.96747  | -1.61464 | 13.55317 |
| H | 0.84578  | -2.43727 | 12.84775 |
| C | -2.37026 | -2.04113 | 18.20004 |
| H | -3.07109 | -1.20433 | 18.20774 |
| C | -0.63080 | -4.20961 | 18.20017 |
| H | 0.05700  | -5.05581 | 18.19105 |
| C | -1.88727 | -4.33683 | 18.79609 |
| H | -2.18629 | -5.27936 | 19.25561 |
| C | -2.75802 | -3.24517 | 18.79380 |
| H | -3.74295 | -3.33117 | 19.25404 |
| C | -0.25449 | -3.00092 | 17.60853 |
| H | 0.72620  | -2.93206 | 17.13579 |
| B | -0.66717 | -0.47072 | 16.94046 |
| N | 4.23990  | -0.51136 | 21.60078 |
| N | 6.06294  | -0.43677 | 23.12112 |
| C | 6.08646  | -1.59955 | 22.36260 |
| C | 2.26224  | 0.60022  | 26.42411 |
| H | 1.65591  | 0.62603  | 27.32989 |
| C | 7.18421  | -2.39168 | 22.75406 |
| H | 7.46701  | -3.35464 | 22.34441 |
| C | 3.83295  | 0.53880  | 24.05860 |
| C | 7.10208  | -0.47762 | 23.97466 |
| H | 7.29075  | 0.32281  | 24.68183 |
| C | 7.82448  | -1.67518 | 23.77131 |
| H | 8.71435  | -1.97242 | 24.31524 |
| C | 3.95743  | 1.57921  | 24.99843 |
| H | 4.66963  | 2.38447  | 24.81208 |
| C | 2.07685  | 0.52163  | 21.15283 |

|   |         |          |          |
|---|---------|----------|----------|
| H | 2.05581 | 0.89266  | 22.17376 |
| C | 2.12271 | -0.44780 | 25.51120 |
| H | 1.40647 | -1.24741 | 25.70231 |
| C | 5.26760 | 1.88476  | 22.12886 |
| C | 2.90237 | -0.47491 | 24.35230 |
| H | 2.77604 | -1.30817 | 23.65834 |
| C | 3.16622 | -0.24980 | 20.72118 |
| C | 3.15405 | -0.75647 | 19.41028 |
| H | 4.01309 | -1.30466 | 19.02757 |
| C | 5.00386 | -1.59244 | 21.47722 |
| H | 4.77538 | -2.37686 | 20.75914 |
| C | 3.18753 | 1.61319  | 26.16480 |
| H | 3.30910 | 2.43550  | 26.87060 |
| C | 6.52629 | 2.04176  | 21.51870 |
| H | 7.22699 | 1.20483  | 21.51037 |
| C | 4.78713 | 4.21046  | 21.52021 |
| H | 4.09938 | 5.05669  | 21.52998 |
| C | 6.04364 | 4.33799  | 20.92443 |
| H | 6.34282 | 5.28084  | 20.46567 |
| C | 6.91424 | 3.24621  | 20.92586 |
| H | 7.89919 | 3.33246  | 20.46569 |
| C | 4.41068 | 3.00135  | 22.11089 |
| H | 3.42993 | 2.93223  | 22.58350 |
| B | 4.82313 | 0.47085  | 22.77740 |

### Compound B (S<sub>1</sub>)

|   |          |          |          |
|---|----------|----------|----------|
| N | -0.11726 | 0.48235  | 18.19666 |
| N | -1.89367 | 0.39484  | 16.61829 |
| C | -1.97626 | 1.54316  | 17.39559 |
| C | 2.01505  | -0.57811 | 13.41631 |
| H | 2.64665  | -0.59275 | 12.52767 |
| C | -3.09979 | 2.30592  | 16.98146 |
| H | -3.42435 | 3.25236  | 17.39787 |
| C | 0.37578  | -0.54543 | 15.73769 |
| C | -2.91149 | 0.41210  | 15.73695 |
| H | -3.05573 | -0.38301 | 15.01383 |
| C | -3.68301 | 1.58598  | 15.93775 |
| H | -4.56444 | 1.86033  | 15.36859 |
| C | 0.13213  | -1.43582 | 14.67301 |
| H | -0.70183 | -2.13647 | 14.74188 |
| C | 1.82091  | -0.84383 | 18.77291 |
| H | 1.62862  | -1.48023 | 17.91561 |
| C | 2.27594  | 0.31946  | 14.45307 |
| H | 3.11319  | 1.01384  | 14.37727 |
| C | -1.12474 | -1.92559 | 17.59611 |
| C | 1.46270  | 0.33449  | 15.59010 |
| H | 1.68735  | 1.05460  | 16.37884 |
| C | 0.94998  | 0.25590  | 19.02111 |
| C | 1.25065  | 1.09112  | 20.14459 |
| H | 0.60719  | 1.92861  | 20.39844 |
| C | -0.93493 | 1.57378  | 18.32081 |
| H | -0.76127 | 2.35629  | 19.04812 |
| C | 0.93387  | -1.45556 | 13.52906 |
| H | 0.71627  | -2.16018 | 12.72566 |

|   |          |          |          |
|---|----------|----------|----------|
| C | -2.27647 | -2.00371 | 18.40272 |
| H | -2.85617 | -1.09947 | 18.59947 |
| C | -0.85094 | -4.34030 | 17.92216 |
| H | -0.28711 | -5.25212 | 17.72263 |
| C | -1.99661 | -4.38663 | 18.71808 |
| H | -2.33287 | -5.33158 | 19.14571 |
| C | -2.70990 | -3.20944 | 18.95808 |
| H | -3.60766 | -3.23136 | 19.57677 |
| C | -0.42666 | -3.12613 | 17.37402 |
| H | 0.46490  | -3.12000 | 16.74418 |
| B | -0.65057 | -0.49625 | 16.98896 |
| N | 4.27586  | -0.48137 | 21.51907 |
| N | 6.05479  | -0.39007 | 23.09442 |
| C | 6.14017  | -1.53675 | 22.31499 |
| C | 2.14654  | 0.55665  | 26.30516 |
| H | 1.51615  | 0.56621  | 27.19473 |
| C | 7.26781  | -2.29562 | 22.72515 |
| H | 7.59522  | -3.24000 | 22.30631 |
| C | 3.78253  | 0.53744  | 23.98133 |
| C | 7.07484  | -0.40462 | 23.97322 |
| H | 7.21759  | 0.38983  | 24.69737 |
| C | 7.85056  | -1.57510 | 23.76871 |
| H | 8.73448  | -1.84678 | 24.33529 |
| C | 4.02577  | 1.42386  | 25.04943 |
| H | 4.85807  | 2.12666  | 24.98236 |
| C | 2.33493  | 0.84196  | 20.94555 |
| H | 2.52683  | 1.47800  | 21.80320 |
| C | 1.88590  | -0.33686 | 25.26485 |
| H | 1.05008  | -1.03320 | 25.33876 |
| C | 5.27399  | 1.92990  | 22.12508 |
| C | 2.69760  | -0.34534 | 24.12662 |
| H | 2.47306  | -1.06229 | 23.33498 |
| C | 3.20671  | -0.25696 | 20.69656 |
| C | 2.90532  | -1.09291 | 19.57381 |
| H | 3.54810  | -1.93110 | 19.32051 |
| C | 5.09723  | -1.56971 | 21.39167 |
| H | 4.92572  | -2.35126 | 20.66282 |
| C | 3.22572  | 1.43689  | 26.19464 |
| H | 3.44296  | 2.13854  | 27.00074 |
| C | 6.42237  | 2.01534  | 21.31448 |
| H | 7.00434  | 1.11389  | 21.11168 |
| C | 4.99093  | 4.34509  | 21.81059 |
| H | 4.42479  | 5.25415  | 22.01622 |
| C | 6.13335  | 4.39866  | 21.01048 |
| H | 6.46487  | 5.34657  | 20.58566 |
| C | 6.84964  | 3.22490  | 20.76269 |
| H | 7.74494  | 3.25253  | 20.14072 |
| C | 4.57282  | 3.12715  | 22.35511 |
| H | 3.68370  | 3.11523  | 22.98830 |
| B | 4.80712  | 0.49647  | 22.72830 |

### Compound C (S<sub>0</sub>)

|   |          |         |          |
|---|----------|---------|----------|
| N | -1.52068 | 1.00931 | 16.53253 |
| N | -3.39316 | 0.95141 | 15.07253 |

|   |          |          |          |
|---|----------|----------|----------|
| C | -3.19211 | 2.22640  | 15.58363 |
| C | 0.02512  | -1.39498 | 12.03249 |
| H | 0.57795  | -1.71161 | 11.14767 |
| C | -4.15759 | 3.10262  | 15.04937 |
| H | -4.25896 | 4.16124  | 15.25975 |
| C | -1.40746 | -0.57544 | 14.34378 |
| C | -4.44513 | 1.00147  | 14.23519 |
| H | -4.79282 | 0.12233  | 13.70359 |
| C | -4.94926 | 2.32118  | 14.20011 |
| H | -5.79852 | 2.65427  | 13.61365 |
| C | -1.72267 | -1.76823 | 13.66682 |
| H | -2.53284 | -2.39580 | 14.04105 |
| C | 0.47928  | -0.24856 | 17.14678 |
| H | 0.38142  | -0.82731 | 16.23225 |
| C | 0.35483  | -0.20243 | 12.68138 |
| H | 1.16680  | 0.41906  | 12.30255 |
| C | -2.96700 | -1.22022 | 16.52382 |
| C | -0.35717 | 0.19740  | 13.81464 |
| H | -0.08191 | 1.13602  | 14.29976 |
| C | -0.46139 | 0.75084  | 17.43315 |
| C | -0.32550 | 1.48214  | 18.62560 |
| H | -1.07460 | 2.22282  | 18.90077 |
| C | -2.08930 | 2.20717  | 16.44403 |
| H | -1.70377 | 3.06604  | 16.98907 |
| C | -1.02092 | -2.17547 | 12.52815 |
| H | -1.29119 | -3.10682 | 12.02944 |
| C | -4.22209 | -1.03740 | 17.13406 |
| H | -4.78132 | -0.11855 | 16.94835 |
| C | -2.84796 | -3.40113 | 17.63711 |
| H | -2.30138 | -4.32541 | 17.82668 |
| C | -4.09690 | -3.19387 | 18.22635 |
| H | -4.53164 | -3.95276 | 18.87759 |
| C | -4.78385 | -2.00535 | 17.97100 |
| H | -5.76056 | -1.83072 | 18.42370 |
| C | -2.29718 | -2.42708 | 16.80048 |
| H | -1.32642 | -2.61990 | 16.34199 |
| B | -2.31435 | -0.07247 | 15.58900 |
| N | 6.11825  | -0.70326 | 22.71308 |
| N | 7.84388  | -0.66275 | 24.34457 |
| C | 8.11806  | -1.58548 | 23.34419 |
| C | 3.80663  | -1.10936 | 27.49901 |
| H | 3.17525  | -1.40173 | 28.33852 |
| C | 9.33662  | -2.23423 | 23.62695 |
| H | 9.81476  | -3.00338 | 23.03112 |
| C | 5.43974  | -0.34152 | 25.30591 |
| C | 8.84365  | -0.71605 | 25.24330 |
| H | 8.84949  | -0.08764 | 26.12732 |
| C | 9.79240  | -1.67728 | 24.82715 |
| H | 10.70565 | -1.92863 | 25.35527 |
| C | 5.30339  | 0.47535  | 26.44371 |
| H | 5.83286  | 1.42848  | 26.48276 |
| C | 0.74358  | 1.24705  | 19.47959 |
| H | 0.83692  | 1.84435  | 20.38514 |
| C | 3.92989  | -1.94316 | 26.38483 |
| H | 3.39586  | -2.89328 | 26.35187 |
| C | 6.65702  | 1.64645  | 23.83448 |
| C | 4.73892  | -1.56195 | 25.31188 |

|   |         |          |          |
|---|---------|----------|----------|
| H | 4.82036 | -2.23390 | 24.45520 |
| C | 1.70868 | 0.26570  | 19.19181 |
| C | 1.54171 | -0.47926 | 18.01168 |
| H | 2.24883 | -1.27217 | 17.77263 |
| C | 7.08221 | -1.56458 | 22.40439 |
| H | 7.03359 | -2.18271 | 21.51053 |
| C | 4.50136 | 0.10129  | 27.52616 |
| H | 4.41701 | 0.75999  | 28.39114 |
| C | 7.89161 | 2.16604  | 23.40224 |
| H | 8.74587 | 1.49637  | 23.28674 |
| C | 5.75491 | 3.92122  | 23.68788 |
| H | 4.91117 | 4.60186  | 23.80595 |
| C | 6.99262 | 4.40919  | 23.26353 |
| H | 7.12201 | 5.47016  | 23.04757 |
| C | 8.06326 | 3.52425  | 23.12142 |
| H | 9.03584 | 3.89177  | 22.79214 |
| C | 5.59556 | 2.56154  | 23.96716 |
| H | 4.62233 | 2.20856  | 24.31072 |
| B | 6.46611 | 0.06534  | 24.11984 |
| C | 2.84773 | 0.02228  | 20.09928 |
| C | 2.73277 | 0.20308  | 21.48838 |
| C | 4.09905 | -0.38285 | 19.60071 |
| C | 3.80305 | -0.02243 | 22.34488 |
| C | 5.17735 | -0.60394 | 20.44665 |
| C | 5.03924 | -0.44568 | 21.83653 |
| H | 1.77363 | 0.49229  | 21.91505 |
| H | 4.24371 | -0.47796 | 18.52565 |
| H | 3.67813 | 0.08928  | 23.41865 |
| H | 6.14744 | -0.85274 | 20.01935 |

### Compound C (S<sub>1</sub>)

|   |              |              |              |
|---|--------------|--------------|--------------|
| N | -1.683137000 | 0.954248000  | 16.749343000 |
| N | -3.495618000 | 0.834273000  | 15.213597000 |
| C | -3.510070000 | 2.037836000  | 15.906756000 |
| C | 0.292877000  | -0.527775000 | 12.015286000 |
| H | 0.901811000  | -0.630307000 | 11.116701000 |
| C | -4.608030000 | 2.818009000  | 15.462906000 |
| H | -4.882333000 | 3.805119000  | 15.816468000 |
| C | -1.288562000 | -0.264709000 | 14.361901000 |
| C | -4.532985000 | 0.833923000  | 14.355082000 |
| H | -4.729281000 | -0.004074000 | 13.695420000 |
| C | -5.248696000 | 2.050644000  | 14.487751000 |
| H | -6.132589000 | 2.322145000  | 13.920999000 |
| C | -1.594980000 | -1.213666000 | 13.366470000 |
| H | -2.456538000 | -1.870019000 | 13.500780000 |
| C | 0.213921000  | -0.408741000 | 17.396249000 |
| H | -0.008520000 | -1.090878000 | 16.582431000 |
| C | 0.617248000  | 0.424522000  | 12.983023000 |
| H | 1.482070000  | 1.073606000  | 12.842384000 |
| C | -2.805738000 | -1.442065000 | 16.342189000 |
| C | -0.167772000 | 0.552733000  | 14.132694000 |
| H | 0.106171000  | 1.312509000  | 14.866879000 |
| C | -0.614408000 | 0.731035000  | 17.583601000 |
| C | -0.282494000 | 1.608132000  | 18.658780000 |

|   |              |              |              |
|---|--------------|--------------|--------------|
| H | -0.881704000 | 2.493516000  | 18.854111000 |
| C | -2.447237000 | 2.083068000  | 16.806734000 |
| H | -2.226287000 | 2.907010000  | 17.473756000 |
| C | -0.822351000 | -1.346213000 | 12.210118000 |
| H | -1.089588000 | -2.092620000 | 11.461289000 |
| C | -3.944898000 | -1.412434000 | 17.169686000 |
| H | -4.482620000 | -0.472285000 | 17.309118000 |
| C | -2.626590000 | -3.836264000 | 16.838948000 |
| H | -2.104093000 | -4.783084000 | 16.698802000 |
| C | -3.758131000 | -3.775969000 | 17.653873000 |
| H | -4.124702000 | -4.672094000 | 18.155321000 |
| C | -4.417578000 | -2.555213000 | 17.818257000 |
| H | -5.303498000 | -2.493979000 | 18.451309000 |
| C | -2.162393000 | -2.684168000 | 16.197243000 |
| H | -1.282632000 | -2.761277000 | 15.555723000 |
| B | -2.283689000 | -0.082103000 | 15.625498000 |
| N | 6.013373000  | -0.822750000 | 22.775596000 |
| N | 7.735357000  | -0.751609000 | 24.414299000 |
| C | 7.920017000  | -1.819279000 | 23.545065000 |
| C | 3.679343000  | -0.369297000 | 27.556207000 |
| H | 3.024804000  | -0.483837000 | 28.420651000 |
| C | 9.083289000  | -2.534960000 | 23.926738000 |
| H | 9.485951000  | -3.416697000 | 23.441913000 |
| C | 5.378012000  | -0.065631000 | 25.298064000 |
| C | 8.730211000  | -0.774341000 | 25.321405000 |
| H | 8.799122000  | -0.036607000 | 26.113211000 |
| C | 9.589355000  | -1.867643000 | 25.044260000 |
| H | 10.475562000 | -2.127421000 | 25.612881000 |
| C | 5.517082000  | 0.744971000  | 26.442127000 |
| H | 6.290950000  | 1.514308000  | 26.461307000 |
| C | 0.784621000  | 1.346807000  | 19.483933000 |
| H | 0.997453000  | 2.052308000  | 20.283307000 |
| C | 3.522380000  | -1.190494000 | 26.438269000 |
| H | 2.743769000  | -1.953804000 | 26.426195000 |
| C | 6.817390000  | 1.586622000  | 23.623493000 |
| C | 4.364508000  | -1.039732000 | 25.332667000 |
| H | 4.222241000  | -1.702319000 | 24.477110000 |
| C | 1.622027000  | 0.206550000  | 19.309084000 |
| C | 1.286530000  | -0.651878000 | 18.219824000 |
| H | 1.873894000  | -1.548308000 | 18.037522000 |
| C | 6.906306000  | -1.837124000 | 22.589023000 |
| H | 6.807772000  | -2.565213000 | 21.793372000 |
| C | 4.685849000  | 0.599378000  | 27.555566000 |
| H | 4.822104000  | 1.246119000  | 28.423020000 |
| C | 7.988454000  | 1.826809000  | 22.879092000 |
| H | 8.646968000  | 0.991907000  | 22.630672000 |
| C | 6.360283000  | 3.992124000  | 23.497766000 |
| H | 5.716578000  | 4.835352000  | 23.750374000 |
| C | 7.527491000  | 4.199455000  | 22.760982000 |
| H | 7.801250000  | 5.202508000  | 22.432691000 |
| C | 8.342817000  | 3.107966000  | 22.451085000 |
| H | 9.258255000  | 3.255648000  | 21.877073000 |
| C | 6.015841000  | 2.703993000  | 23.917953000 |
| H | 5.104423000  | 2.571345000  | 24.503710000 |
| B | 6.438373000  | 0.076526000  | 24.082581000 |
| C | 2.735496000  | -0.057911000 | 20.186470000 |
| C | 2.927346000  | 0.649803000  | 21.410694000 |



|   |             |              |              |
|---|-------------|--------------|--------------|
| C | 3.716638000 | -1.045099000 | 19.877704000 |
| C | 3.989169000 | 0.399629000  | 22.245607000 |
| C | 4.785545000 | -1.301201000 | 20.702392000 |
| C | 4.960729000 | -0.586878000 | 21.924906000 |
| H | 2.199768000 | 1.394243000  | 21.723917000 |
| H | 3.649246000 | -1.595388000 | 18.942293000 |
| H | 4.081181000 | 0.941813000  | 23.180852000 |
| H | 5.518580000 | -2.038550000 | 20.385505000 |
